# Supplementary material for: Dual-mode chemosensor for the fluorescence detection of zinc and hypochlorite on a fluorescein backbone and its cell-imaging applications
Source: Royal Society of Chemistry journal article supplement (doi:10.1039/d2ay00855f), 2022-01-01
Supplement: d2ay00855f1.pdf [file d2ay00855f1.pdf]

## Dual mode chemosensor for fluorescence detection of zinc and hypochlorite on fluorescein backbone and cell imaging application

Sibaprasad Maity <sup>\*a</sup>, Annada C Maity<sup>b</sup>, Avijit kumar Das<sup>\*c</sup>, Nandan Bhattacharyya<sup>d</sup>

<sup>a</sup>*Department of Applied Sciences, Haldia Institute of Technology, Hatiberia, Haldia, -721657, West Bengal, India. E-mail: [sprimaity2003@gmail.com](mailto:sprimaity2003@gmail.com)*

<sup>b</sup>*Department of Chemistry, Indian Institute of Engineering Science and Technology, Shibpur, Howrah 711103, West Bengal, India*

<sup>c</sup>*Department of Chemistry, CHRIST (Deemed to be University), Hosur Road, Bangalore, Karnataka, 560029 India, Email: [avijitkumar.das@christuniversity.in](mailto:avijitkumar.das@christuniversity.in)*

<sup>d</sup>*Panskura Banamali College, Purba Medinipur, West Bengal, India*

## 1. General procedure for drawing Job plot by Fluorescence method:

Stock solution of same concentration of **FAD** and  $\text{Zn}^{2+}$  were prepared in the order of  $\approx 1.0 \times 10^{-5}$  M in acetonitrile/aqueous HEPES buffered solution (1:1, pH 7.2) solution. The emission in each case with different *host-guest* ratio but equal in volume was recorded. Job plots were drawn by plotting  $\Delta I \cdot X_{\text{host}}$  vs  $X_{\text{host}}$  ( $\Delta I$  = change of intensity of the fluorescence spectrum at 426 nm during titration and  $X_{\text{host}}$  is the mole fraction of the host in each case, respectively).

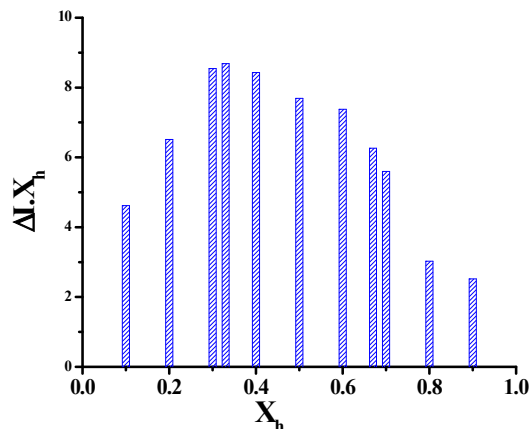

**Figure S<sub>1</sub>:** Jobs plot diagram of **FAD** for  $\text{Zn}^{2+}$  (where  $X_h$  is the mole fraction of host and  $\Delta I$  indicates the change of the emission intensity).

## 2. Binding constant

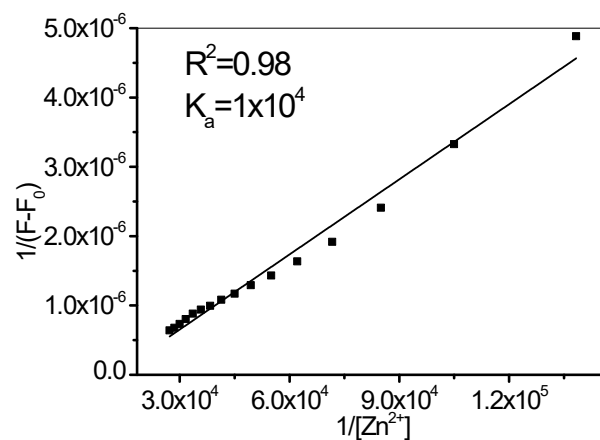

**Figure S<sub>2</sub>:** Changes of Fluorescence Intensity of **FAD** ( $c=1 \times 10^{-5}$ M) as a function of  $[\text{Zn}^{2+}]$  ( $c = 2 \times 10^{-4}$ M) at 426 nm.

### 3. Calculation of the detection limit:

#### For Zn<sup>2+</sup>

The detection limit (DL) of **FAD** in emission spectra for Zn<sup>2+</sup> was determined from the following equation:

$$DL = K * Sb1/S$$

Where K = 2 or 3 (we take 3 in this case); Sb1 is the standard deviation of the blank solution; S is the slope of the calibration curve.

From the graph Figure we get slope = 51476, and Sb1 value is 30638.11

Thus using the formula we get the Detection Limit for Zn<sup>2+</sup> = 1.79 μM in Fluorescence spectra.

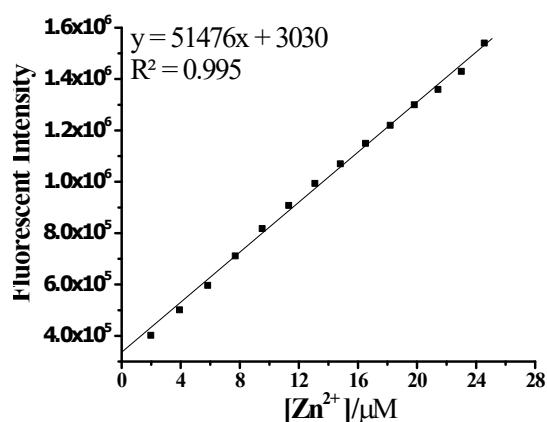

**Figure S<sub>3</sub>:** Changes of Fluorescence Intensity of **FAD** ( $c = 1 \times 10^{-5} \text{M}$ ) as a function of  $[\text{Zn}^{2+}]$  ( $c = 2 \times 10^{-4} \text{M}$ ) at 426 nm.

#### For hypochlorite,

The detection limit (DL) of **FAD** in fluorescence spectra for  $\text{OCl}^-$  was determined from the following equation:

$$DL = K * Sb1/S$$

Where K = 2 or 3 (we take 3 in this case); Sb1 is the standard deviation of the blank solution; S is the slope of the calibration curve.

Thus, using the formula, we get the Detection Limit for  $\text{OCl}^- = 2.24 \mu\text{M}$  in Fluorescence spectra.

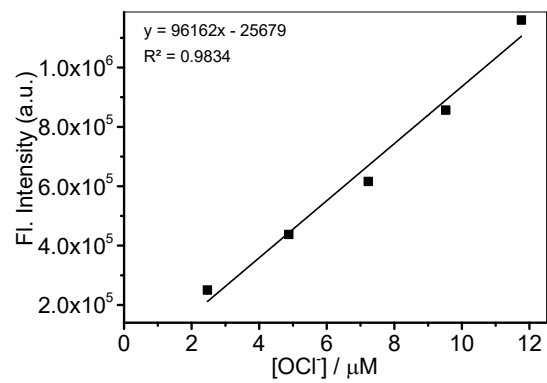

**Figure S<sub>4</sub>:** Changes of Fluorescence Intensity of **FAD** ( $c = 1 \times 10^{-5} \text{M}$ ) as a function of  $[\text{OCI}^-]$  ( $c = 2 \times 10^{-4} \text{M}$ ) at 520 nm.

4.  $^1\text{H}$  NMR spectrum of Compound 1 in  $\text{d}_6\text{-DMSO}$  (500 MHz):

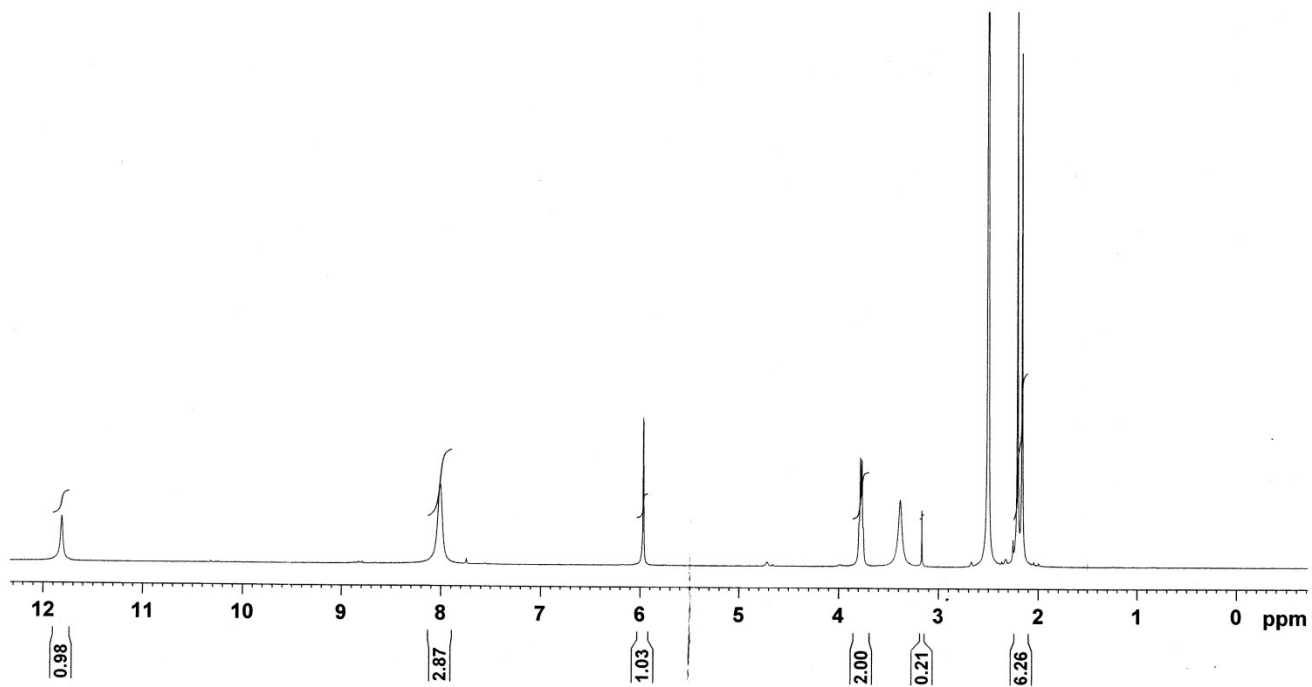

5.  $^1\text{H}$  NMR spectrum of Compound 2 in  $\text{d}_6\text{-DMSO}$  (500 MHz):

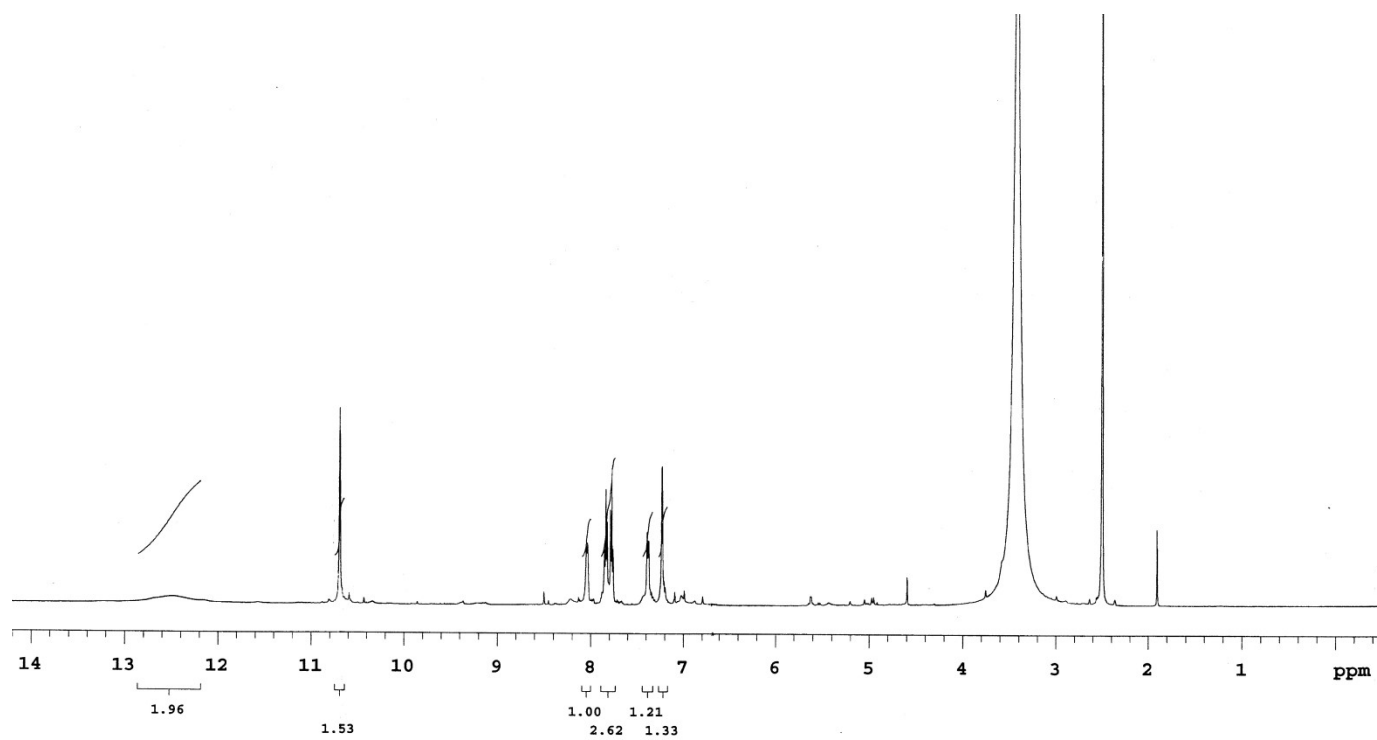

6. <sup>1</sup>H NMR spectrum of FAD in d<sub>6</sub>-DMSO (500 MHz):

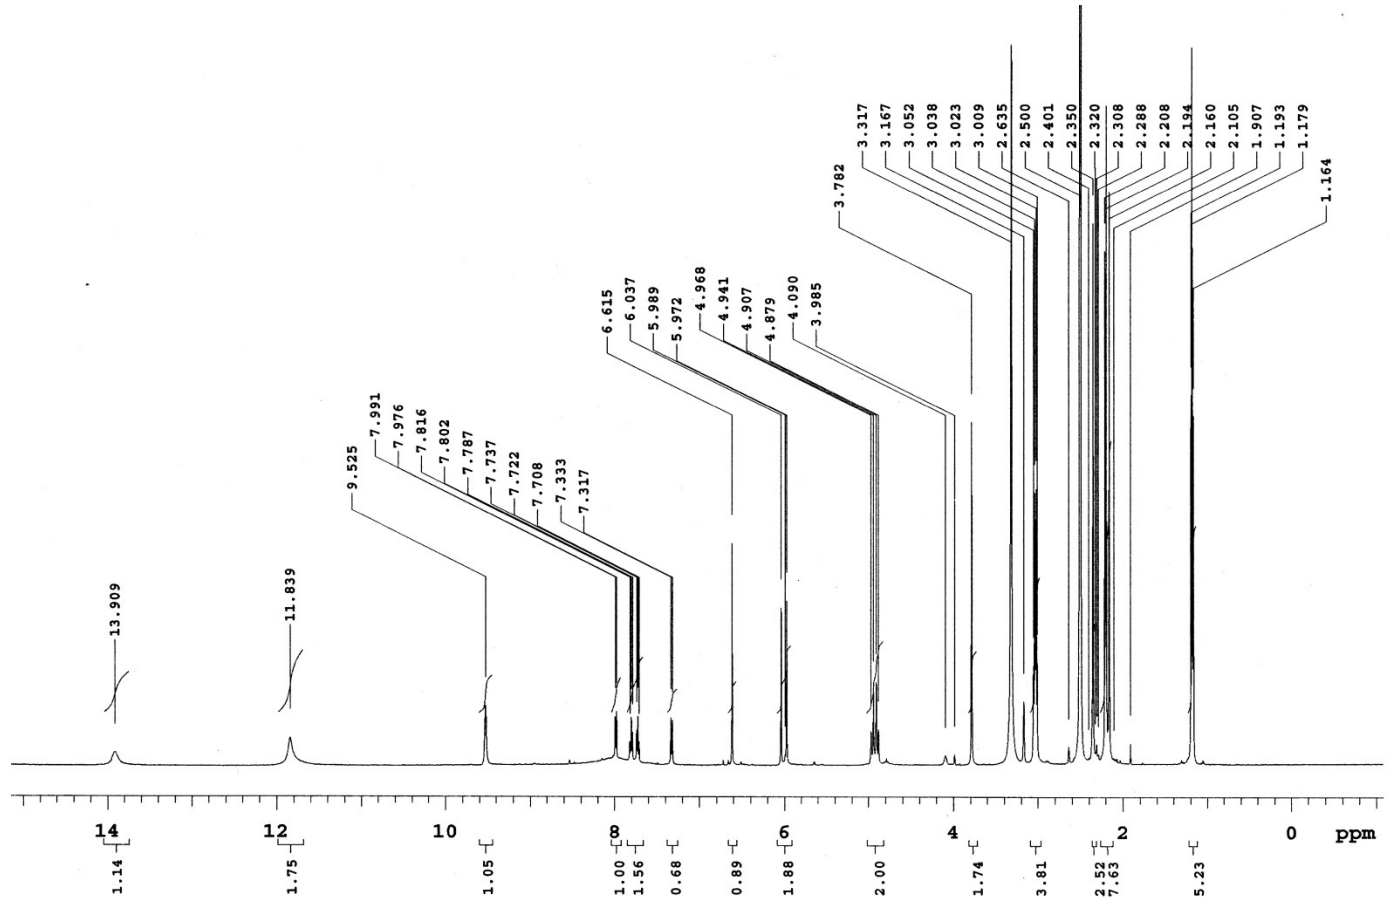

## 7. Mass spectrum of FAD

**Instrument:** Agilent 6310 Ion Trap

**Operator:** Suhi

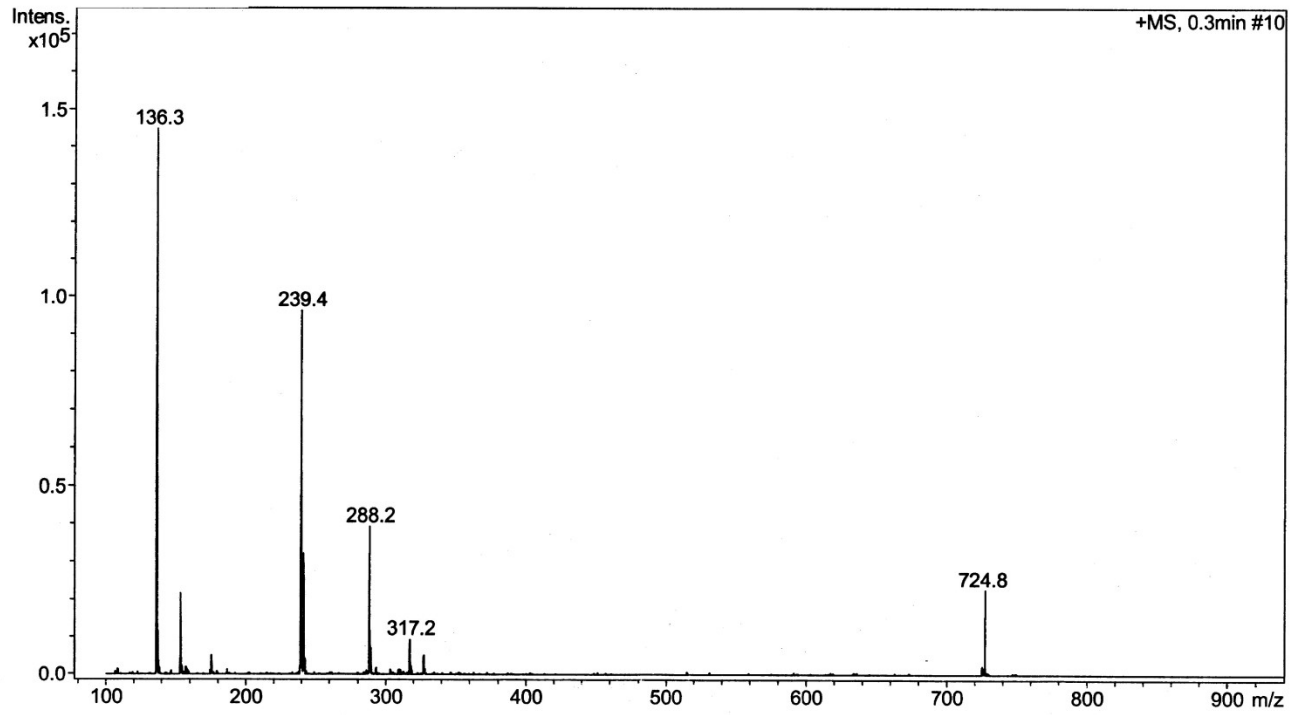

Analysed By
